# Supplementary material for: Angiogenic and molecular diversity determine hepatic melanoma metastasis and response to anti-angiogenic treatment
Source: Springer Nature journal article supplement (doi:10.1186/s12967-022-03255-4), 2022-02-02

# Suppl. Figure 1

## A

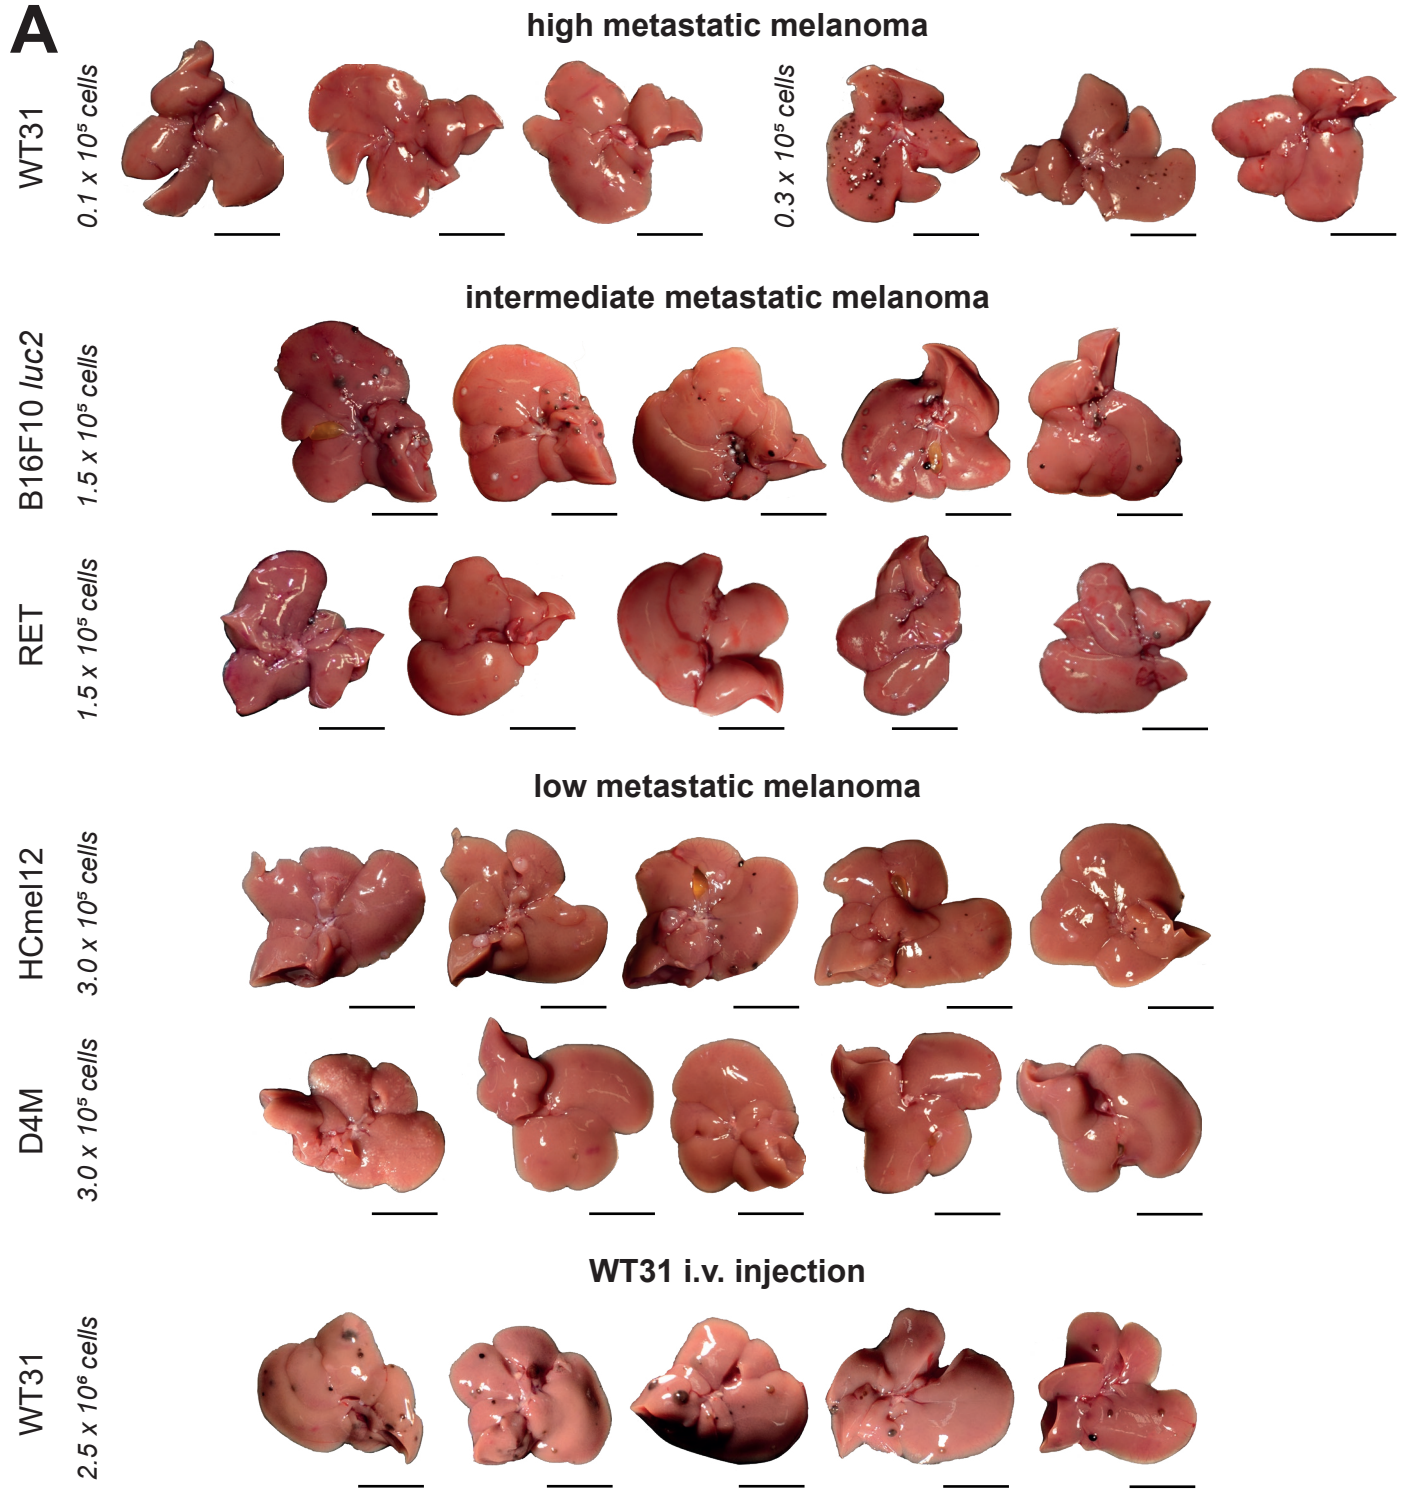

## B

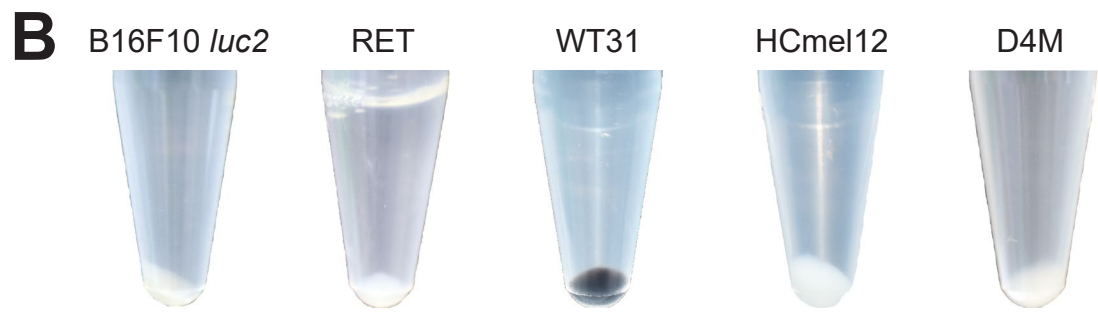

## C

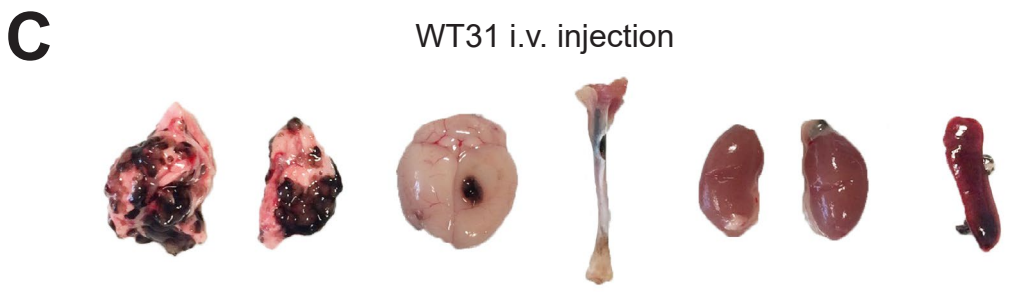

# Suppl. Figure 2

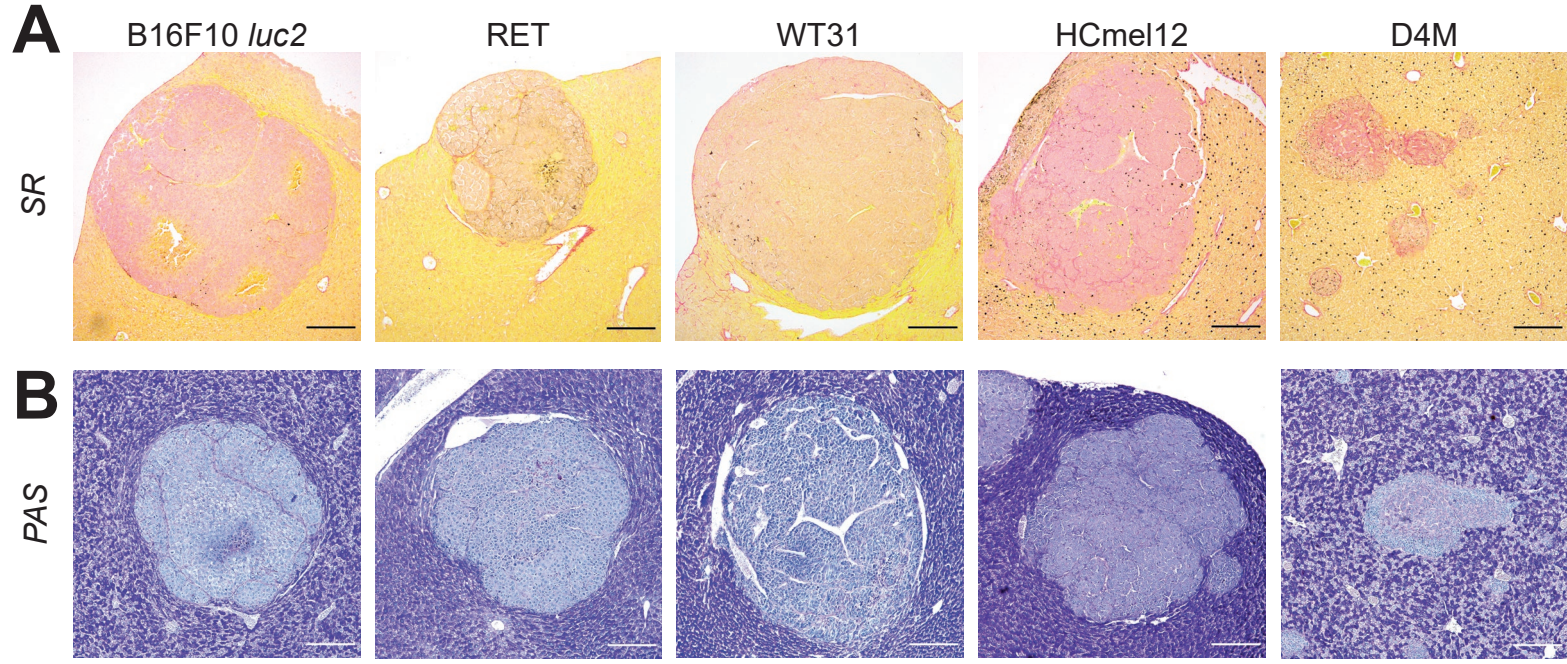

# Suppl. Figure 3

## A

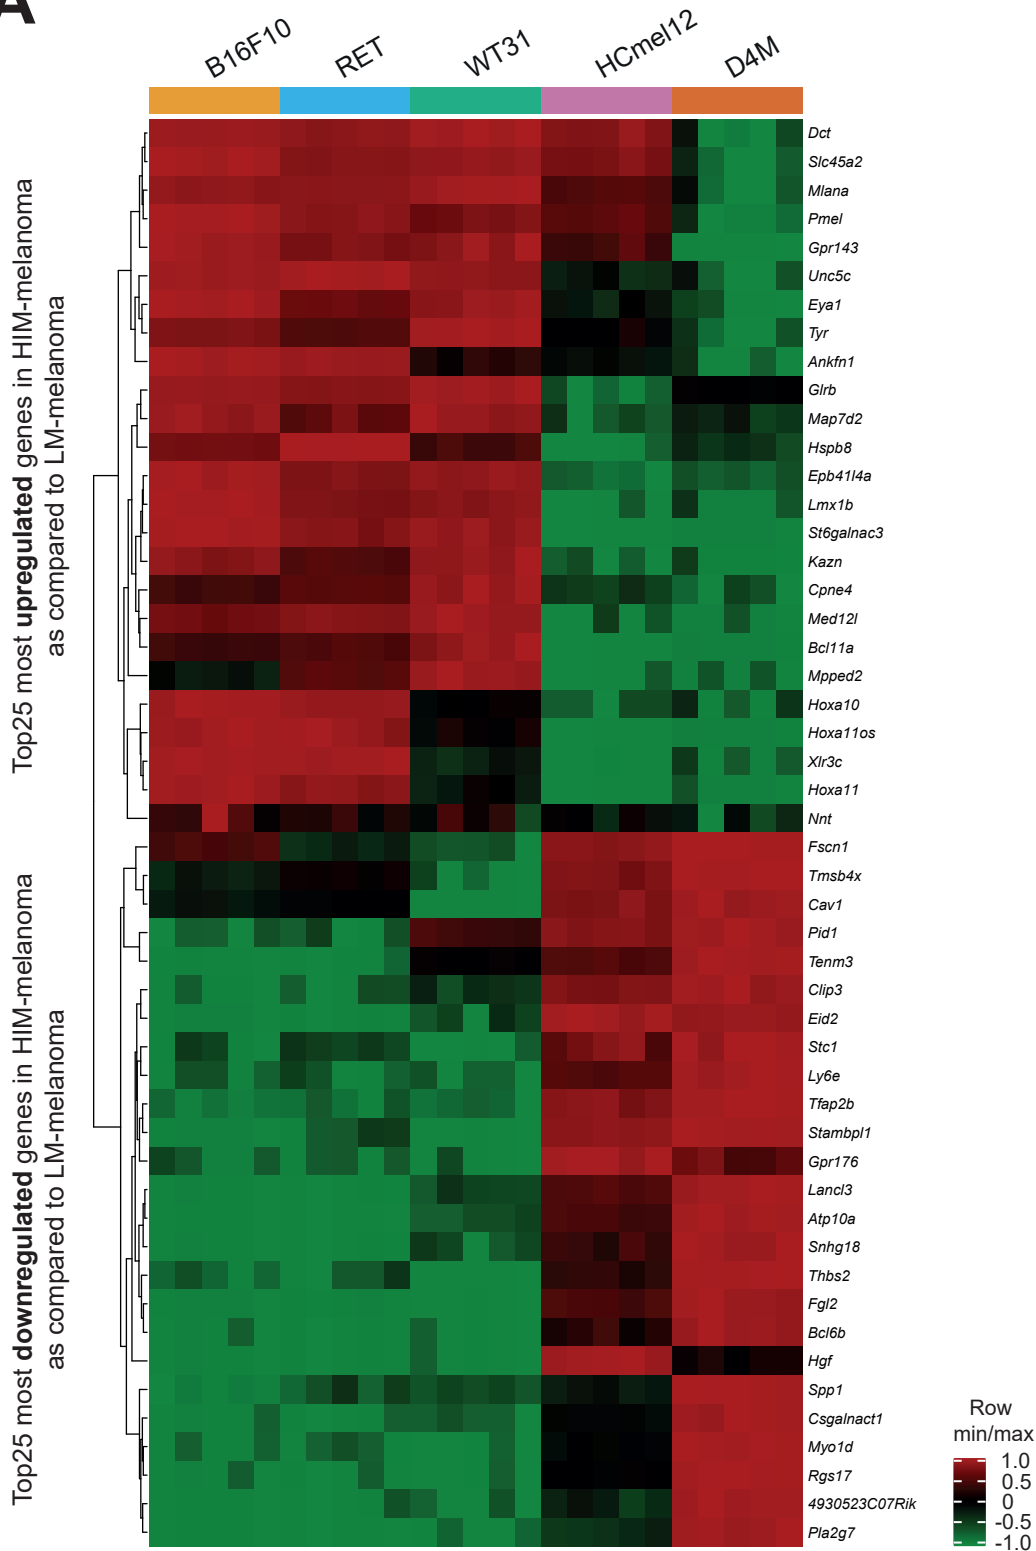

## B

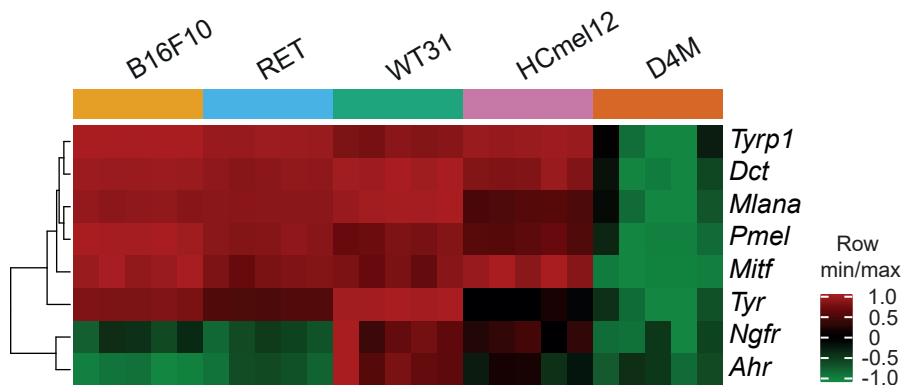

# Suppl. Figure 4

GOBP - Cell migration

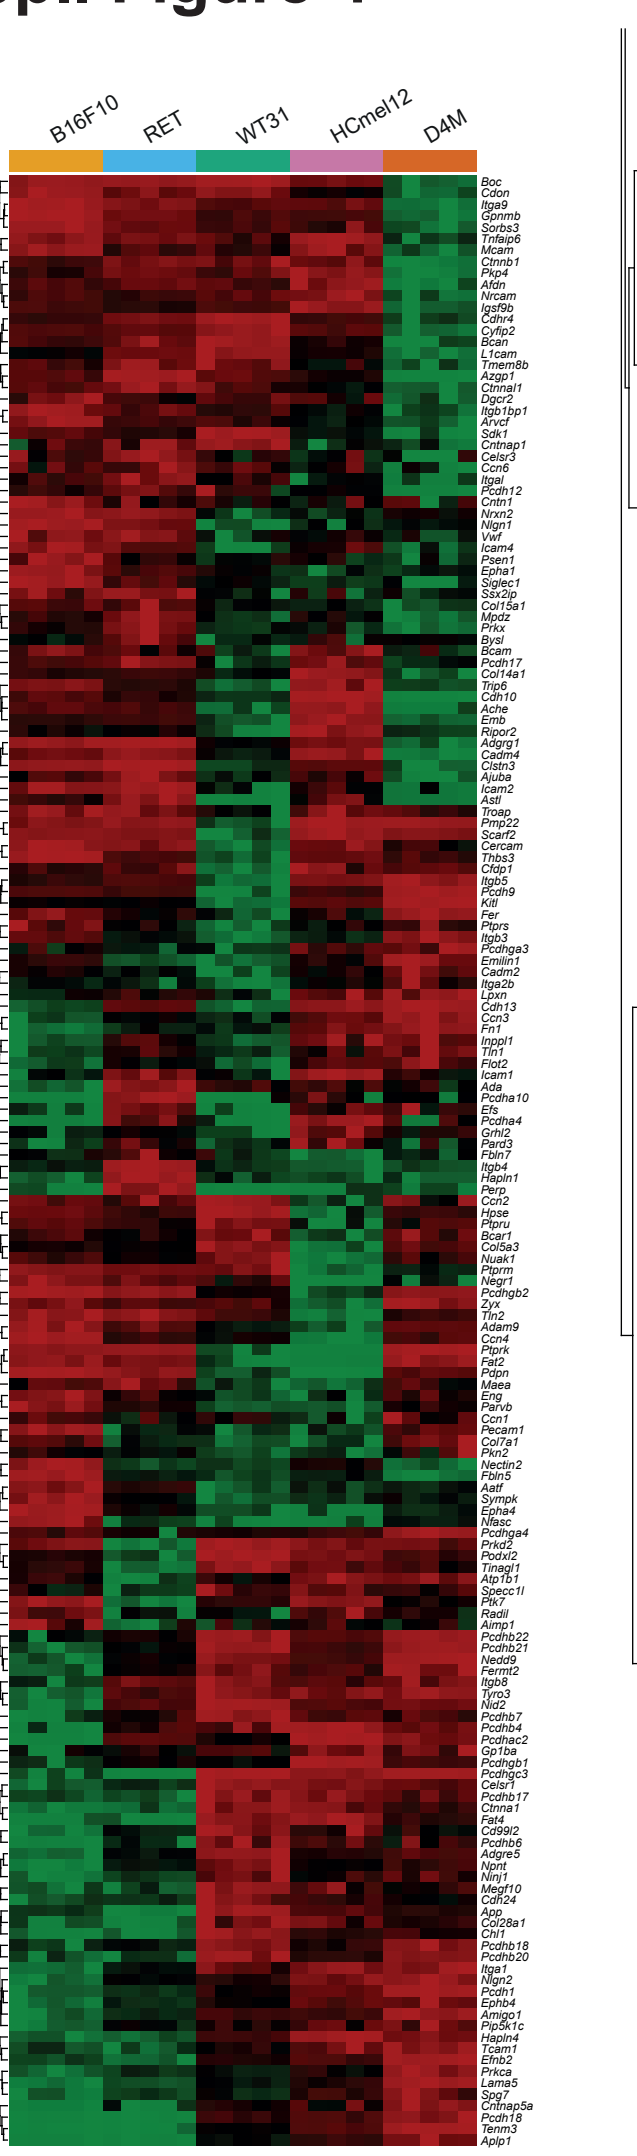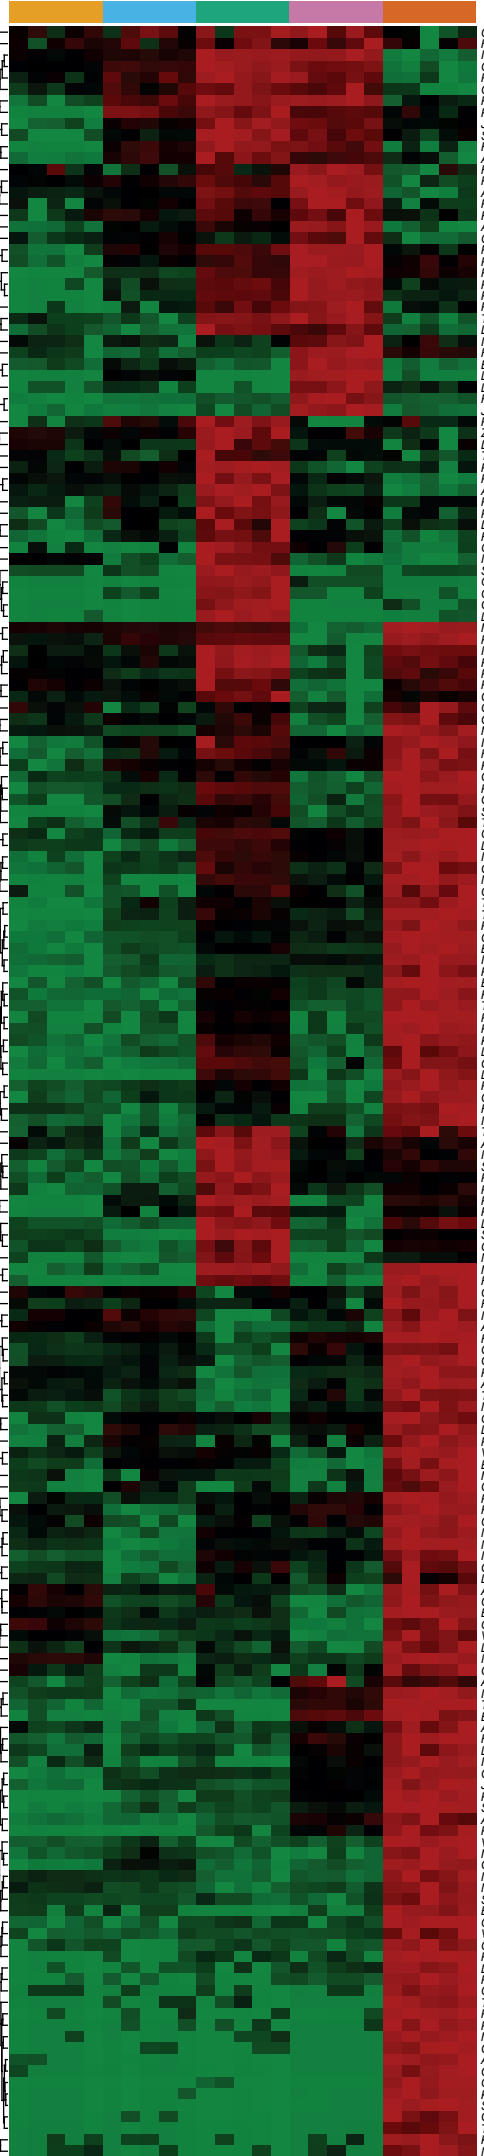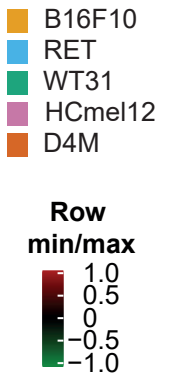

*Cd84*  
*Hyal3*  
*Igsf11*  
*Celsr2*  
*Pcdhb12*  
*Cdhr2*  
*Pcdhb14*  
*Pcdhb8*  
*Jup*  
*Sdk2*  
*Frem2*  
*Adam23*  
*Fermt3*  
*Pcdhb16*  
*Adam12*  
*Pcdh10*  
*Rst1*  
*Atp1b2*  
*Cdh1*  
*Pcdhb15*  
*Pcdhb5*  
*Ptptr*  
*Pcdhb3*  
*Pcdhb2*  
*Pcdhb13*  
*Tenn2*  
*Lamb2*  
*Icam5*  
*F11r*  
*Egfl7*  
*Ly9*  
*Lama3*  
*Rac1*  
*Jam3*  
*Pcdhb10*  
*Zan*  
*Dsg2*  
*Tytl1*  
*Pstpip1*  
*Prkce*  
*Abl1*  
*Pcdhb9*  
*Pcdhb11*  
*Dst*  
*Farp2*  
*Gpr1bb*  
*Igsa4*  
*Svep1*  
*Omg*  
*Cdh3*  
*Cdh11*  
*Lama1*  
*Mkra8*  
*Pcdh19*  
*Igfbp7*  
*Rhob*  
*Parva*  
*Postn*  
*Ctndd1*  
*Cdh17*  
*Cib1*  
*Mtge8*  
*Igsa6*  
*Hes1*  
*Rom1*  
*Col8a1*  
*Pcb1*  
*Col12a1*  
*Srxp2*  
*Tor1a*  
*Cdh6*  
*Lamb1*  
*Igsa2*  
*Cistn1*  
*Nectn1*  
*Cd24a*  
*Thbs1*  
*Tnc*  
*Flpp3*  
*Col18a1*  
*E49alt1*  
*Igsa3*  
*Pxn*  
*Emp2*  
*Rgmb*  
*Tgfb1*  
*Pcdhga7*  
*Par3b*  
*Kirrel3*  
*Lamc1*  
*Cd47*  
*Lrn3*  
*Pcdh7*  
*Col6a1*  
*Fap*  
*Igfb1*  
*Tm9sf4*  
*Amigo3*  
*Igsa8*  
*Src*  
*Pcdhb19*  
*Ptk2b*  
*Pcdhga6*  
*Pcdhga9*  
*Lama4*  
*Sdc3*  
*Cadm1*  
*Ntm*  
*Mylh10*  
*Flrt2*  
*Cxadr*  
*Fes*  
*Igsb2*  
*Ackr3*  
*Fblim1*  
*Cdh2*  
*Col5a1*  
*Ptk2b*  
*Alcam*  
*Tnfrsf12a*  
*Neo1*  
*Cyp11b1*  
*Lgals3bp*  
*Pcdhgb8*  
*Vcl*  
*Edil3*  
*Mstn*  
*Cdh15*  
*Pcdhgc5*  
*Rhoa*  
*Cgref1*  
*Ncam1*  
*Nptn*  
*Igav*  
*Cd44*  
*Lpp*  
*Adam17*  
*Col16a1*  
*Epha2*  
*Cd164*  
*Vim1*  
*Lmin*  
*Igsa5*  
*Cd33*  
*Aggf1*  
*Igsa7*  
*Thbs2*  
*Emilin2*  
*Abl2*  
*Flrt3*  
*Lamec2*  
*Igsb7*  
*Gd9*  
*Jcad*  
*Fcd1*  
*Spp1*  
*Adam15*  
*Pcdh20*  
*Vcam1*  
*Myh9*  
*Cx3orf1*  
*Nectn3*  
*Nid1*  
*Stab1*  
*Eves2*  
*Cd93*  
*Vcan*  
*Cd34*  
*Pcdhga10*  
*Dchs1*  
*Pkp1*  
*Cntnap4*  
*Tnr*  
*Pcdhga11*  
*Pcdhgb5*  
*Mip3*  
*Cdh23*  
*Cadm2*  
*Cadm3*  
*Col6a2*  
*Kira4*  
*Sels*  
*Cdhr26*  
*Tinag*  
*Kira2*  
*Nrxn1*

# Suppl. Figure 5

## GOBP - Angiogenesis

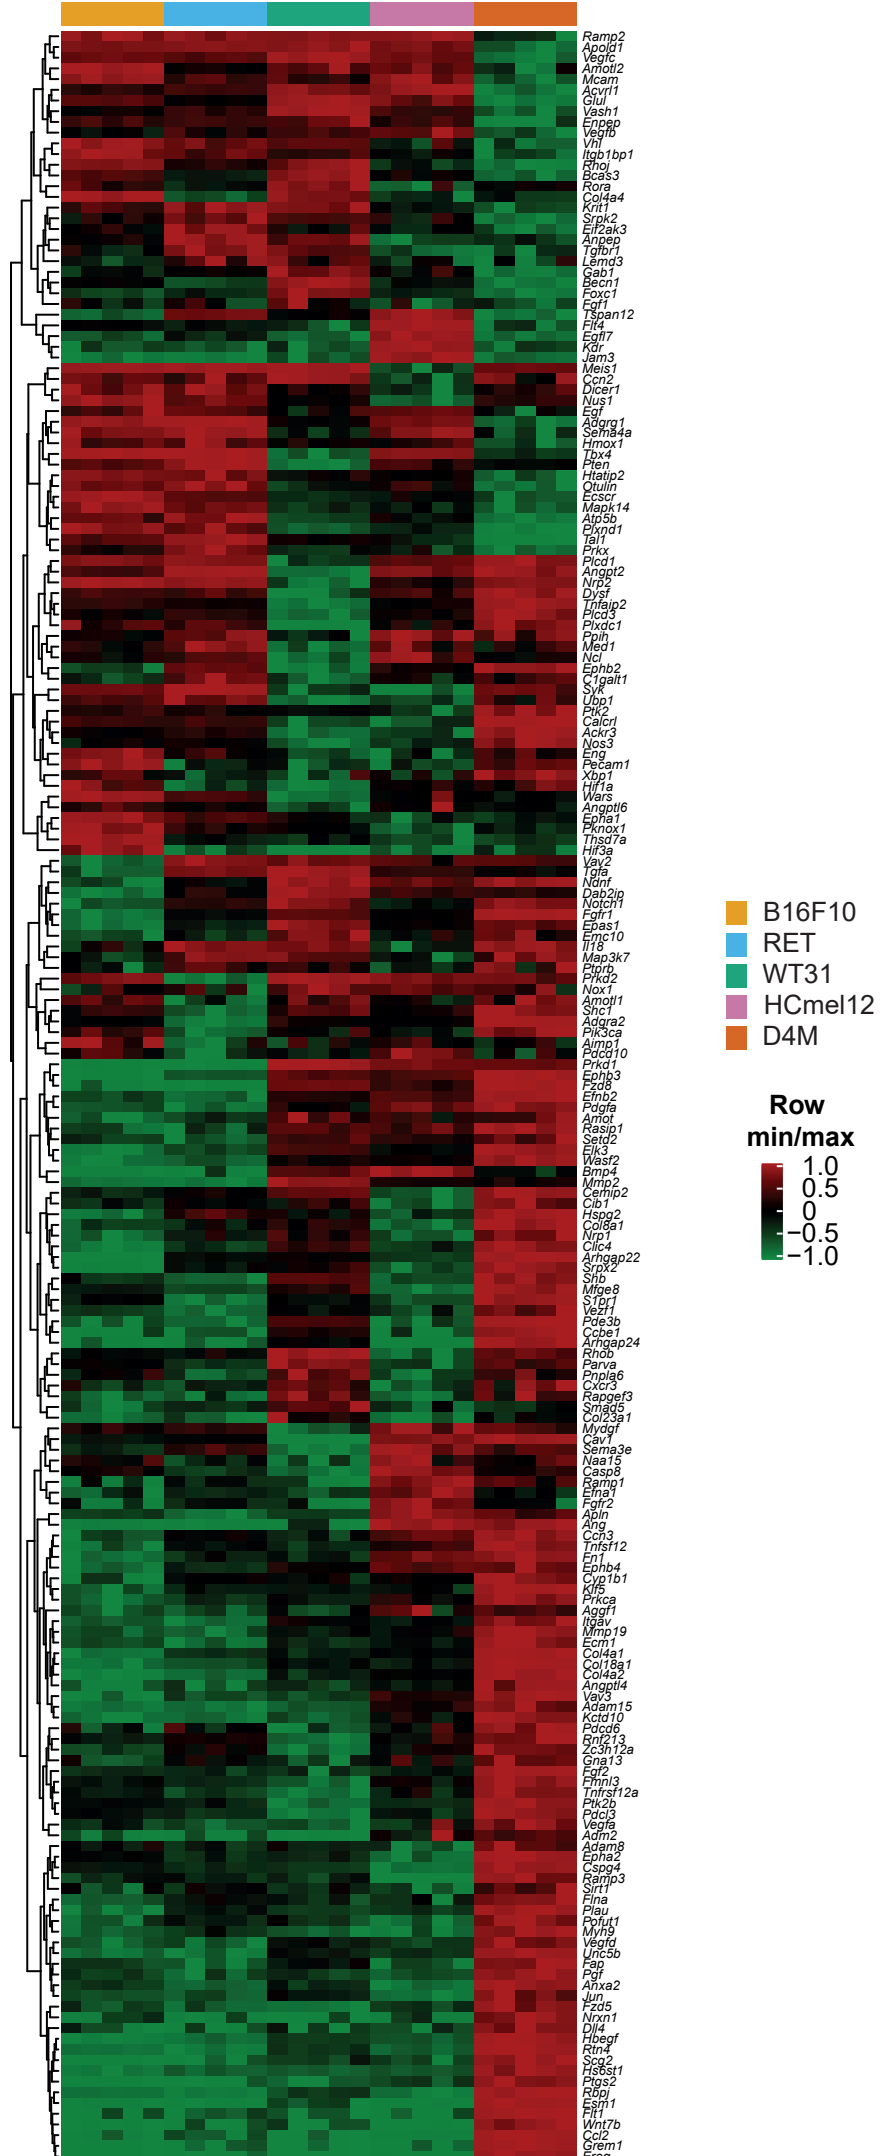

# Suppl. Figure 6

## A

CD32b CD31 DAPI

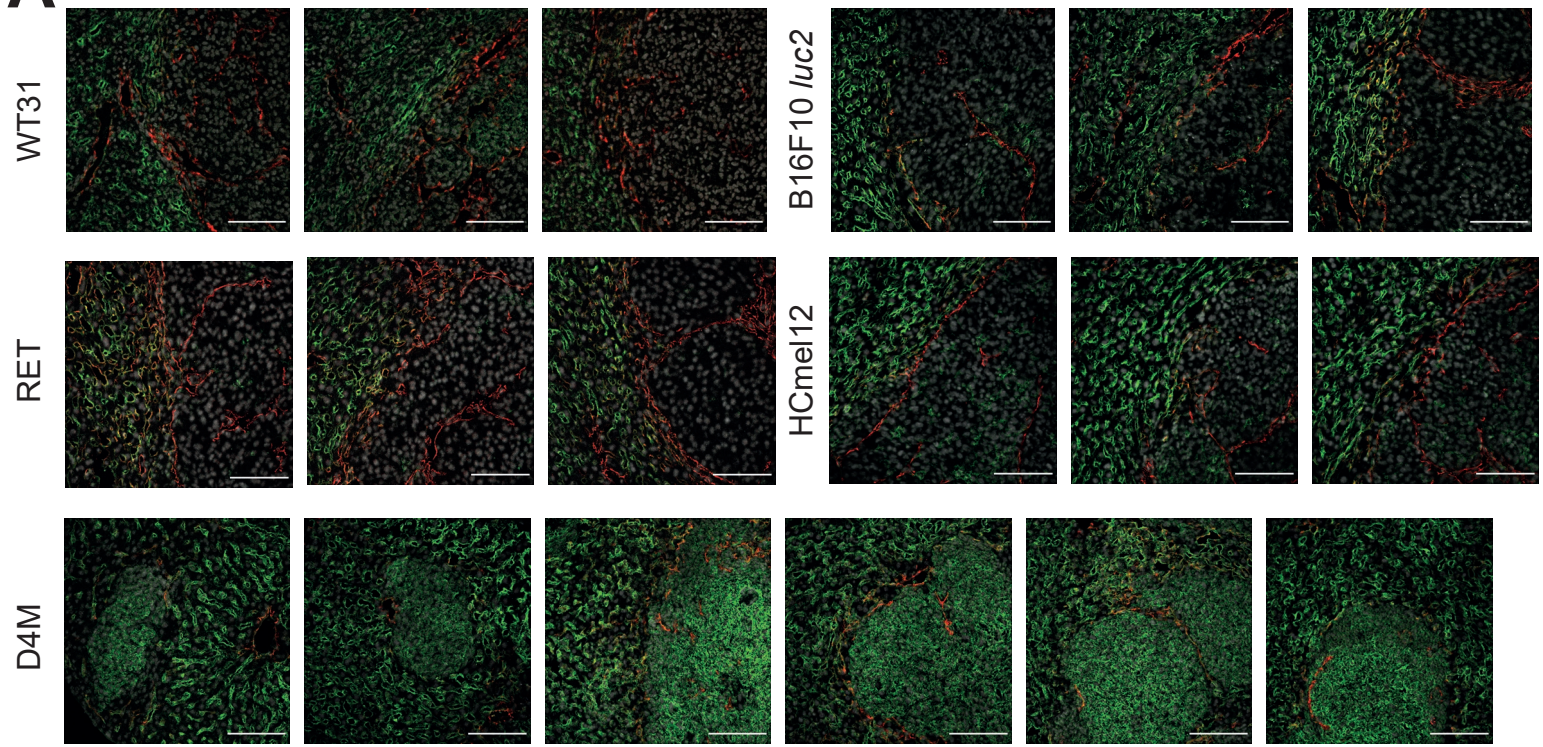

## B

Coll. IV CD31 DAPI

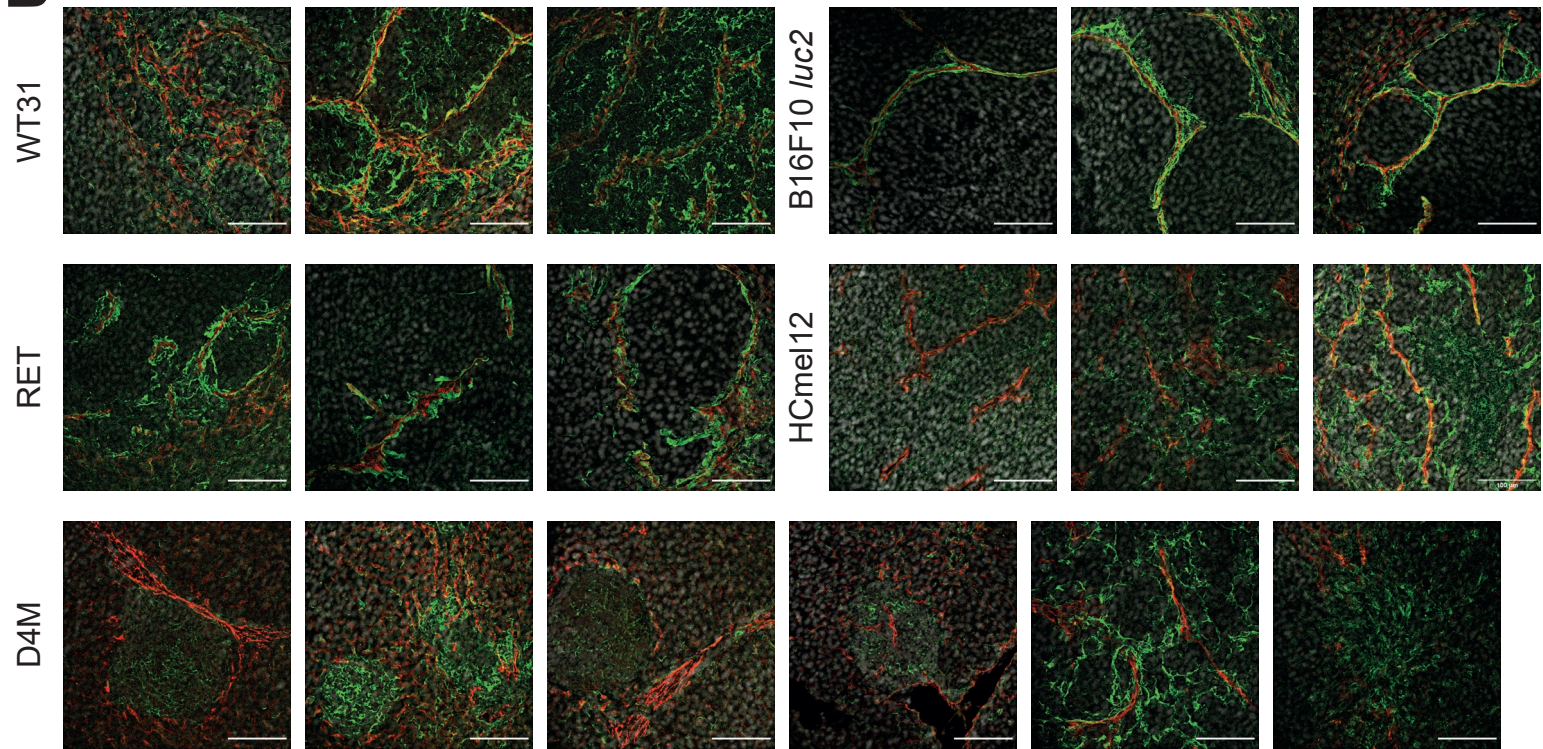

# Suppl. Figure 7

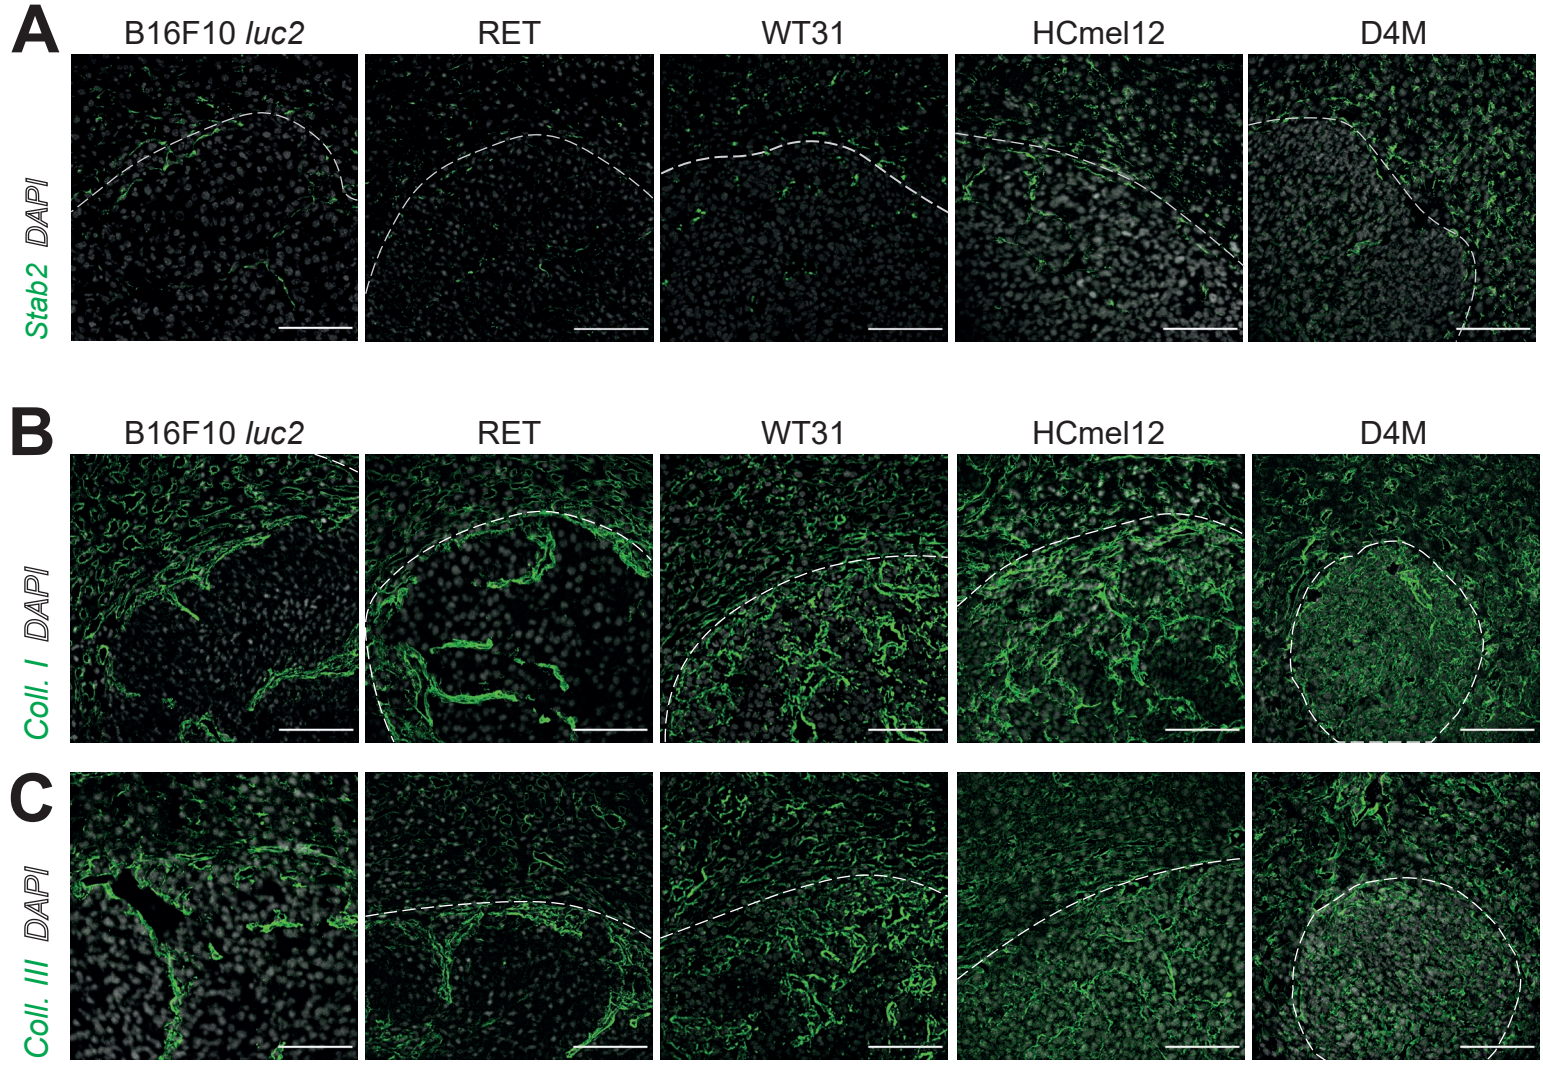

# Suppl. Figure 8

**A**

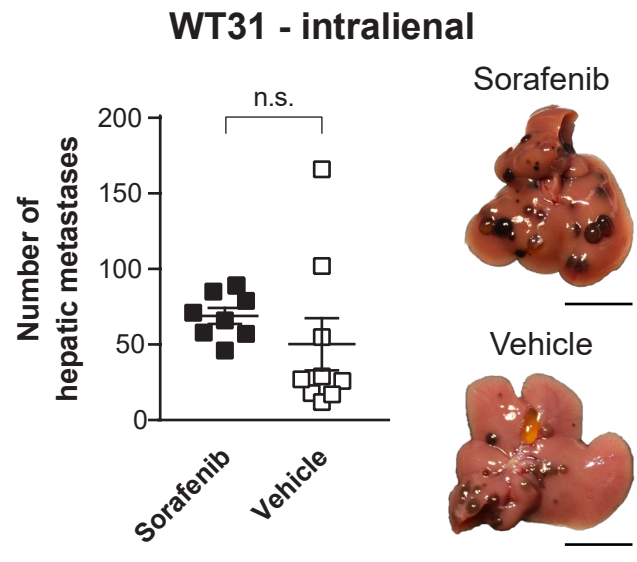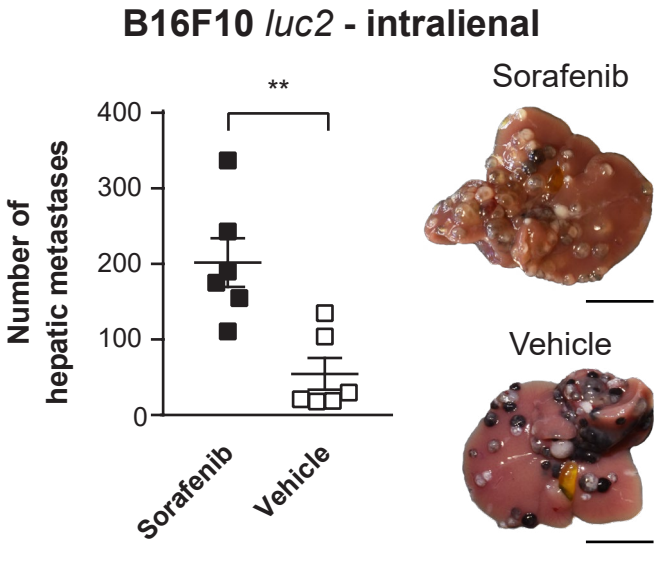

**B**

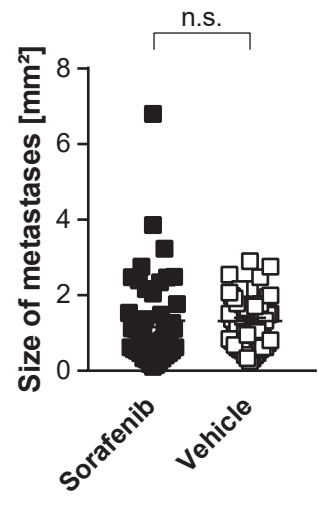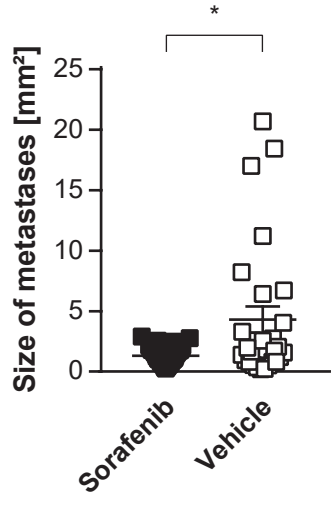

**C**

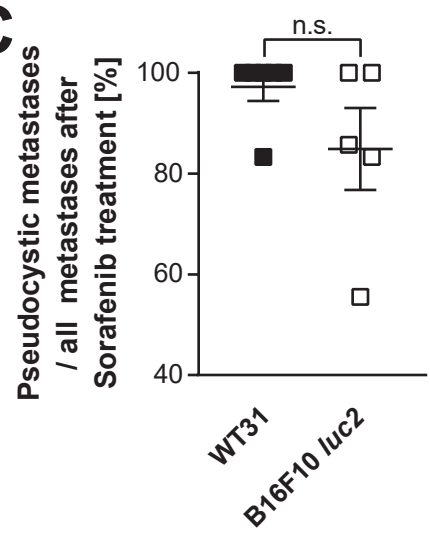

Supplement: MOESM1 [file 20093464]
